# Supplementary material for: Heme Oxygenase-1 Has a Greater Effect on Melanoma Stem Cell Properties Than the Expression of Melanoma-Initiating Cell Markers
Source: MDPI journal article supplement (doi:10.3390/ijms23073596), 2022-03-25
Supplement: s1 [file s1]

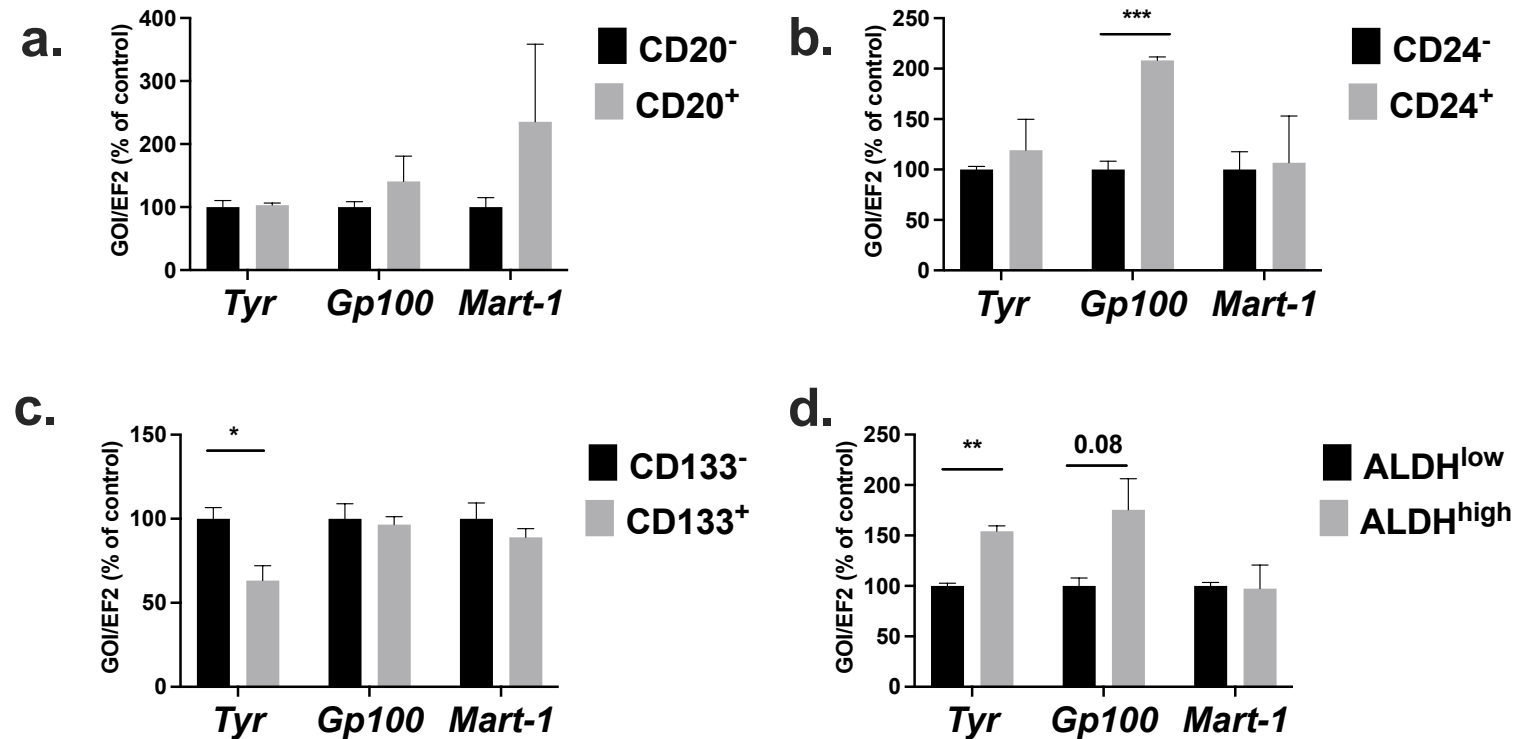

**Figure S2.** Expression of MAAs in MIC<sup>-</sup> and MIC<sup>+</sup> subsets. qRT-PCR analysis on 50 sorted cells (a) CD20<sup>-/+</sup>, (b) CD24<sup>-/+</sup>, (c) CD133<sup>-/+</sup> and (d) ALDH<sup>low/high</sup> cells, after pre-amplification with the AmpliGrid system; GOI – gene of interest; EF2 was used as a reference gene; each bar represents mean + SEM; \* - p<0.05, \*\*\* - p<0.001 versus MIC<sup>-</sup> cells.
