# Supplementary material for: Heme Oxygenase-1 Has a Greater Effect on Melanoma Stem Cell Properties Than the Expression of Melanoma-Initiating Cell Markers
Source: MDPI journal article supplement (doi:10.3390/ijms23073596), 2022-03-25
Supplement: s1 [file s1]

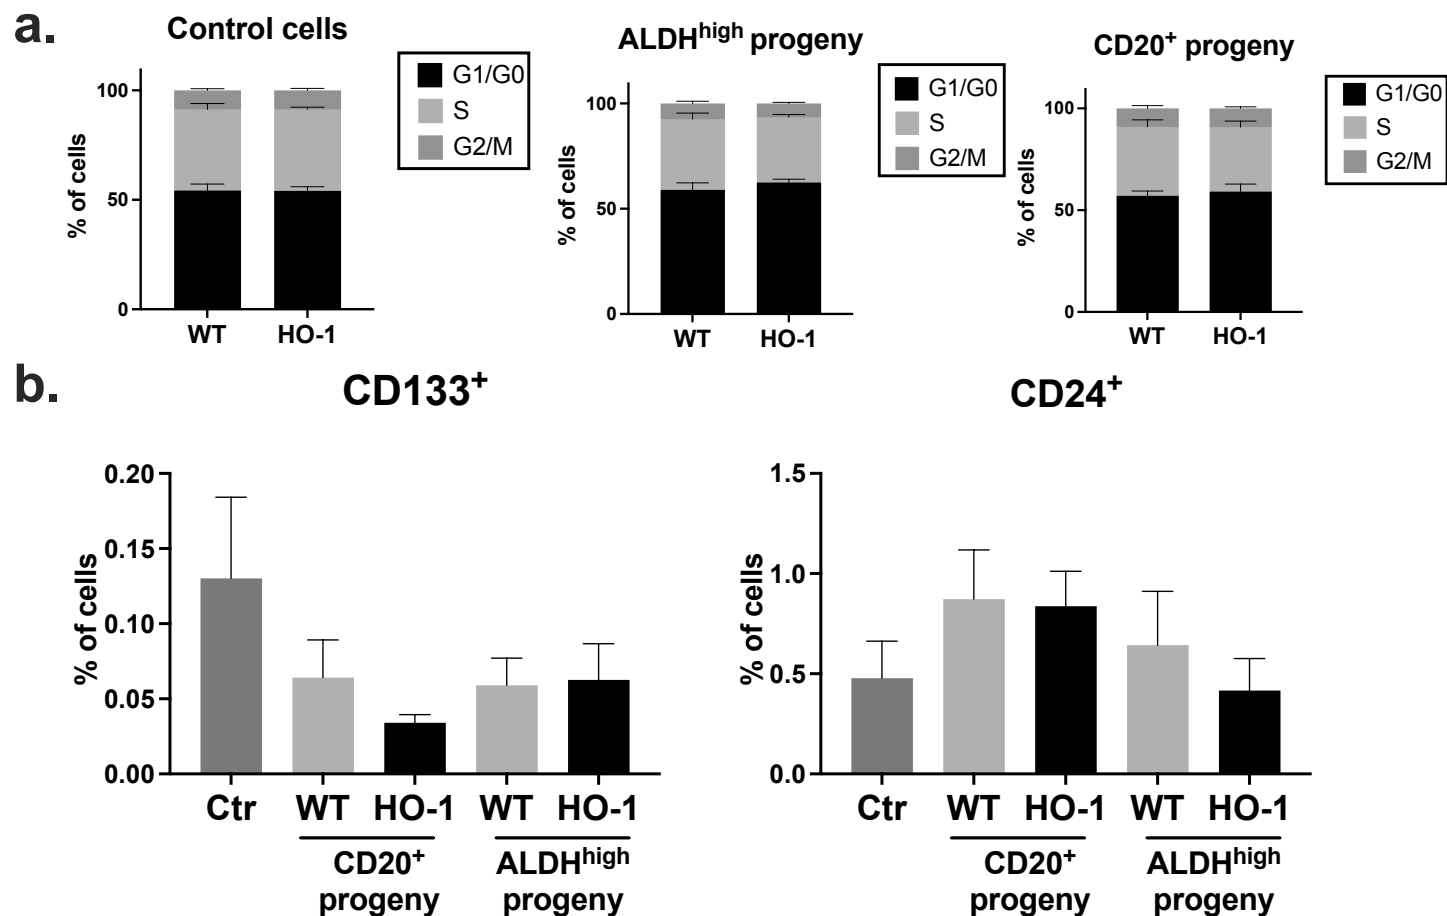

**Figure S4.** Flow cytometry phenotyping of MIC progeny. **(a)** Frequency of cells at different cell cycle phases in parental (control) cell lines and in cell lines derived from ALDH<sup>high</sup> and CD20<sup>+</sup> clones, bars represent means + SEM; **(b)** Frequency of CD133<sup>+</sup> and CD24<sup>+</sup> cells in CD20<sup>+</sup> and ALDH<sup>high</sup>-derived clonogenic cell lines and in the control cell line (WT Luc). Flow cytometry analysis, each bar represents mean + SEM.
