# Supplementary material for: Heme Oxygenase-1 Has a Greater Effect on Melanoma Stem Cell Properties Than the Expression of Melanoma-Initiating Cell Markers
Source: MDPI journal article supplement (doi:10.3390/ijms23073596), 2022-03-25
Supplement: s1 [file s1]

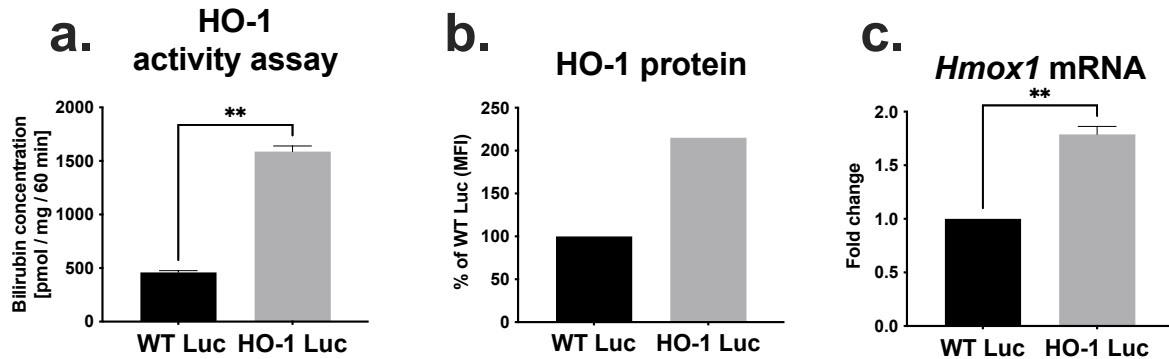

**Figure S1.** Characterization of B16-F10 HO-1 Luc cell line. **(a)** Measurement of HO-1 activity (bilirubin production assay). Data presented as mean+SD; \*\* p<0.01); **(b)** Detection of HO-1 protein (representative FACS analysis); **(c)** Detection of HO-1 mRNA (qRT-PCR)
