# Supplementary material for: Heme Oxygenase-1 Has a Greater Effect on Melanoma Stem Cell Properties Than the Expression of Melanoma-Initiating Cell Markers
Source: MDPI journal article supplement (doi:10.3390/ijms23073596), 2022-03-25
Supplement: s1 [file s1]

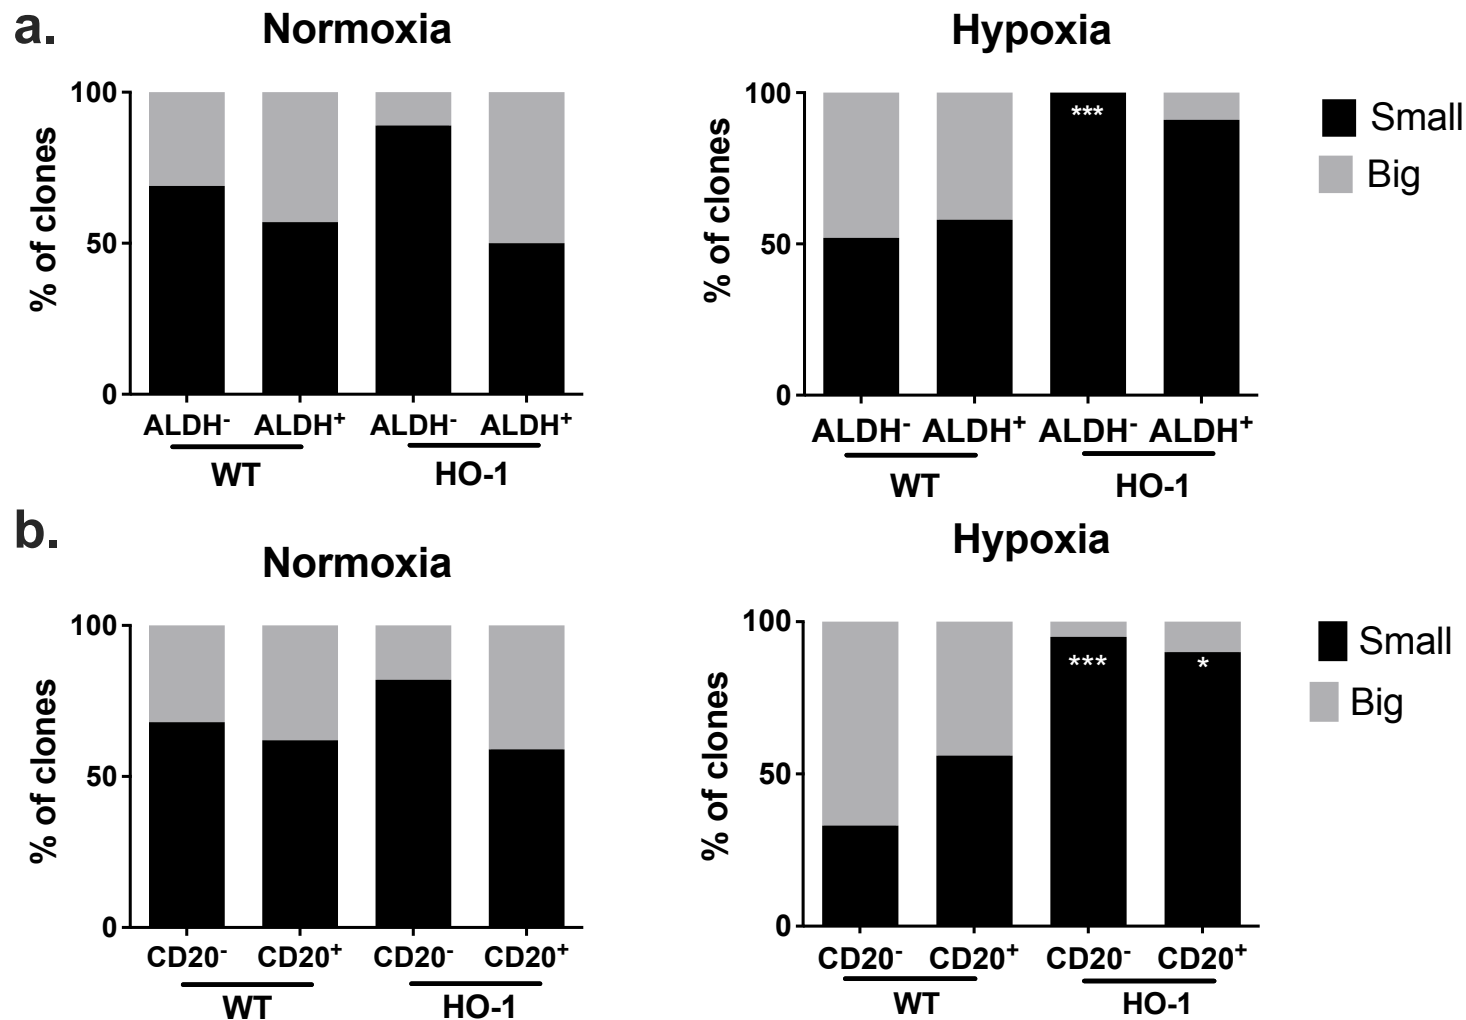

**Figure S3.** Morphology of MIC<sup>-</sup> and MIC<sup>+</sup>-derived clones 13 days after sorting. **(a)** Frequency of small and big ALDH<sup>high</sup> and ALDH<sup>low</sup> clones (n=9-32, Fisher's exact test); **(b)** Frequency of small and big CD20<sup>-</sup> and CD20<sup>+</sup> clones (n=9-42, Fisher exact test; \* - p<0.05, \*\*\* - p<0.001 versus WT).
