# Supplementary material for: Heme Oxygenase-1 Has a Greater Effect on Melanoma Stem Cell Properties Than the Expression of Melanoma-Initiating Cell Markers
Source: MDPI journal article supplement (doi:10.3390/ijms23073596), 2022-03-25
Supplement: s1 [file s1]

**a.**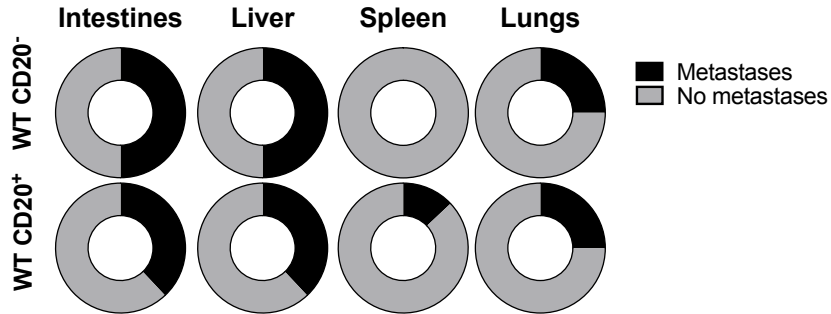**b.**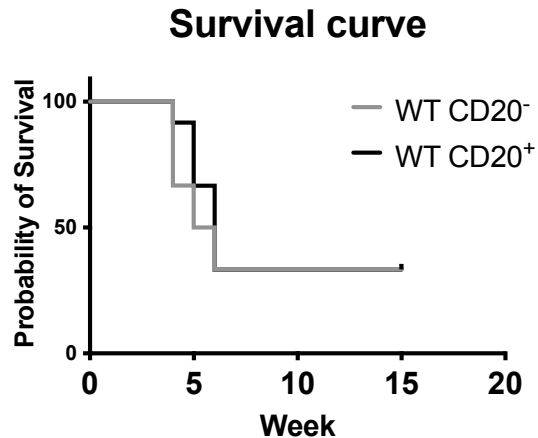

**Figure S5.** Metastases formation and survival of C57BL/6 mice injected with CD20<sup>-</sup> and CD20<sup>+</sup> cells. **(a)** Frequency of metastases measured by detection of luciferase activity in the *post-mortem* excised organs using IVIS luminometer (n=10-12). **(b)** Survival curves of CD20<sup>-</sup> and CD20<sup>+</sup> recipients. Mice were sacrificed when tumors reached 10 mm in diameter.
