# Supplementary material for: Heme Oxygenase-1 Has a Greater Effect on Melanoma Stem Cell Properties Than the Expression of Melanoma-Initiating Cell Markers
Source: Int J Mol Sci. 2022 Mar 25;23(7):3596. doi: 10.3390/ijms23073596 (PMC8998882; doi:10.3390/ijms23073596)
Supplement: Supplementary file 1 [file ijms-23-03596-s001.zip › Supplementary Table S1.xlsx]

## Sheet: Sheet1
CSC-associated genes	Houskeeping genes (control)
Abcb5	Actb
Abcg2	B2m
Alcam	Gapdh
Aldh1a1	Gusb
Atm	Hsp90ab1
Atxn1
Axl
Bmi1
Bmp7
Cd24a
Cd34
Cd38
Cd44
Chek1
Dach1
Ddr1
Dkk1
Dll1
Dll4
Dnmt1
Egf
Eng
Epcam
Erbb2
Etfa
Fgfr2
Flot2
Foxa2
Foxp1
Fzd7
Gata3
Gsk3b
Hdac1
Id1
Ikbkb
Itga2
Itga4
Itga6
Itgb1
Jag1
Jak2
Kit
Kitl
Klf17
Klf4
Lats1
Lin28a
Lin28b
Maml1
Mertk
Ms4a1
Muc1
Myc
Mycn
Nanog
Nfkb1
Nos2
Notch1
Notch2
Pecam1
Plat
Plaur
Pou5f1
Prom1
Ptch1
Ptprc
Sav1
Sirt1
Smo
Snai1
Snai2
Sox2
Stat3
Taz
Tgfbr1
Thy1
Twist1
Twist2
Wee1
Wnt1
Wwc1
Yap1
Zeb1
Zeb2
